# Supplementary material
Source: PubMed Central journal article supplement (PMC4780419)
Supplement: NIHMS230048-supplement-1.pdf [file NIHMS230048-supplement-1.pdf]

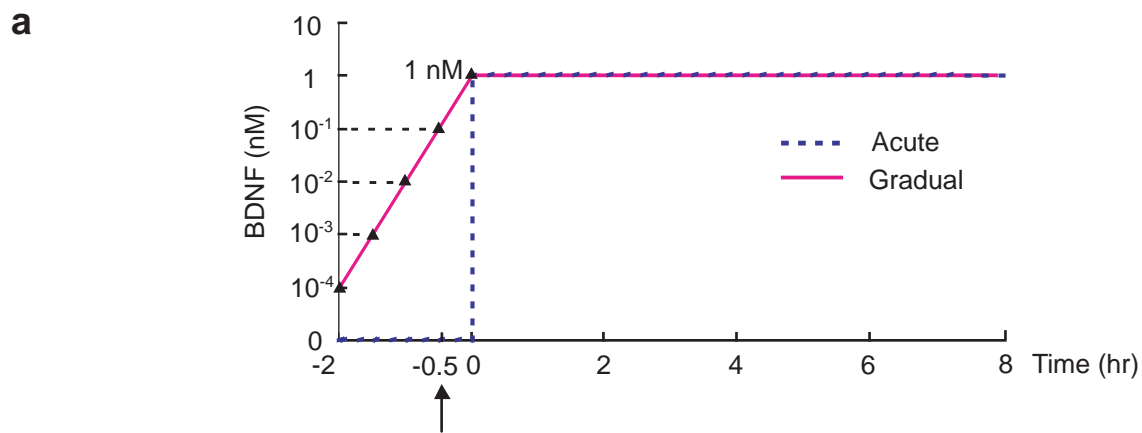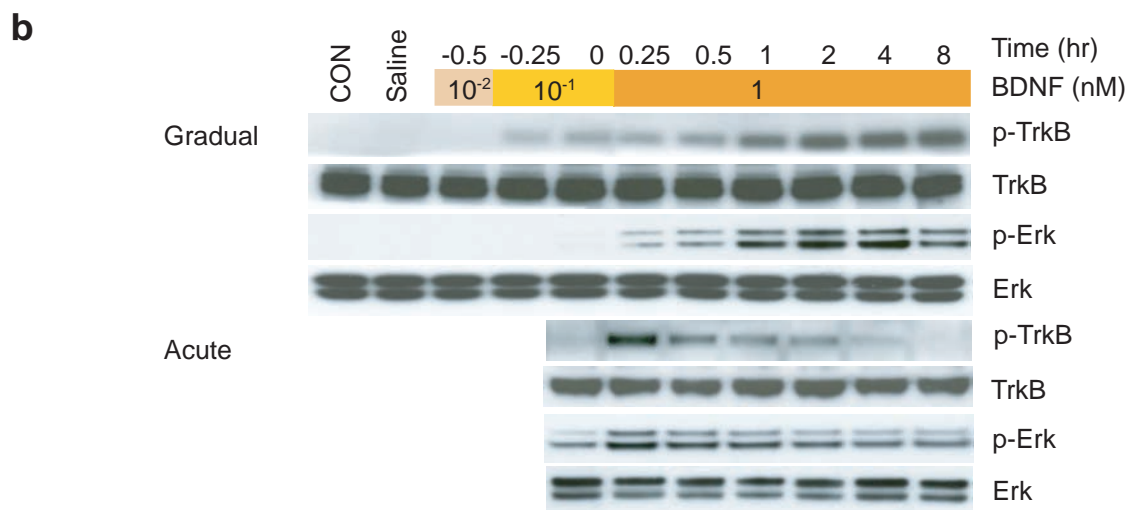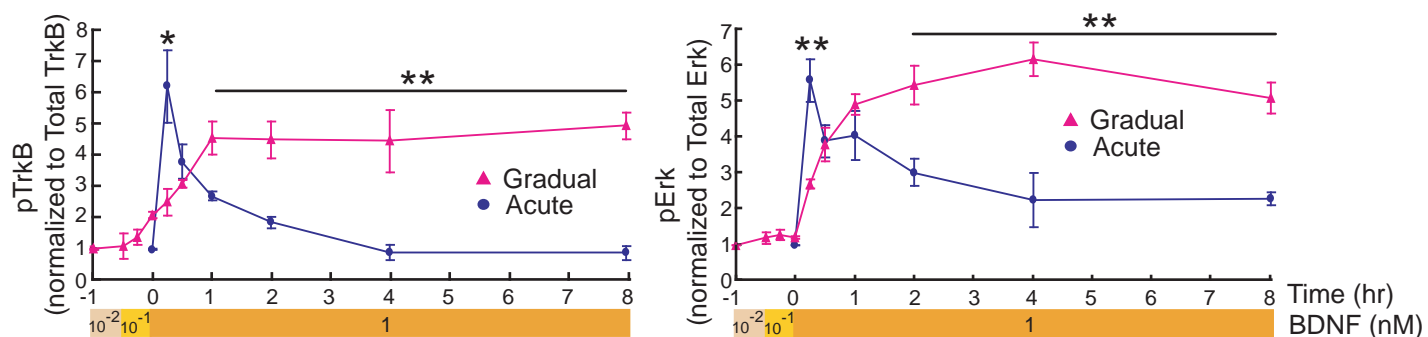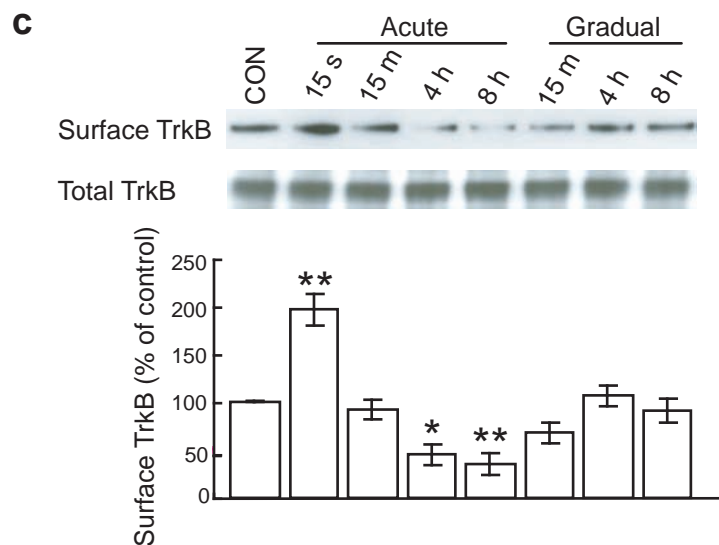

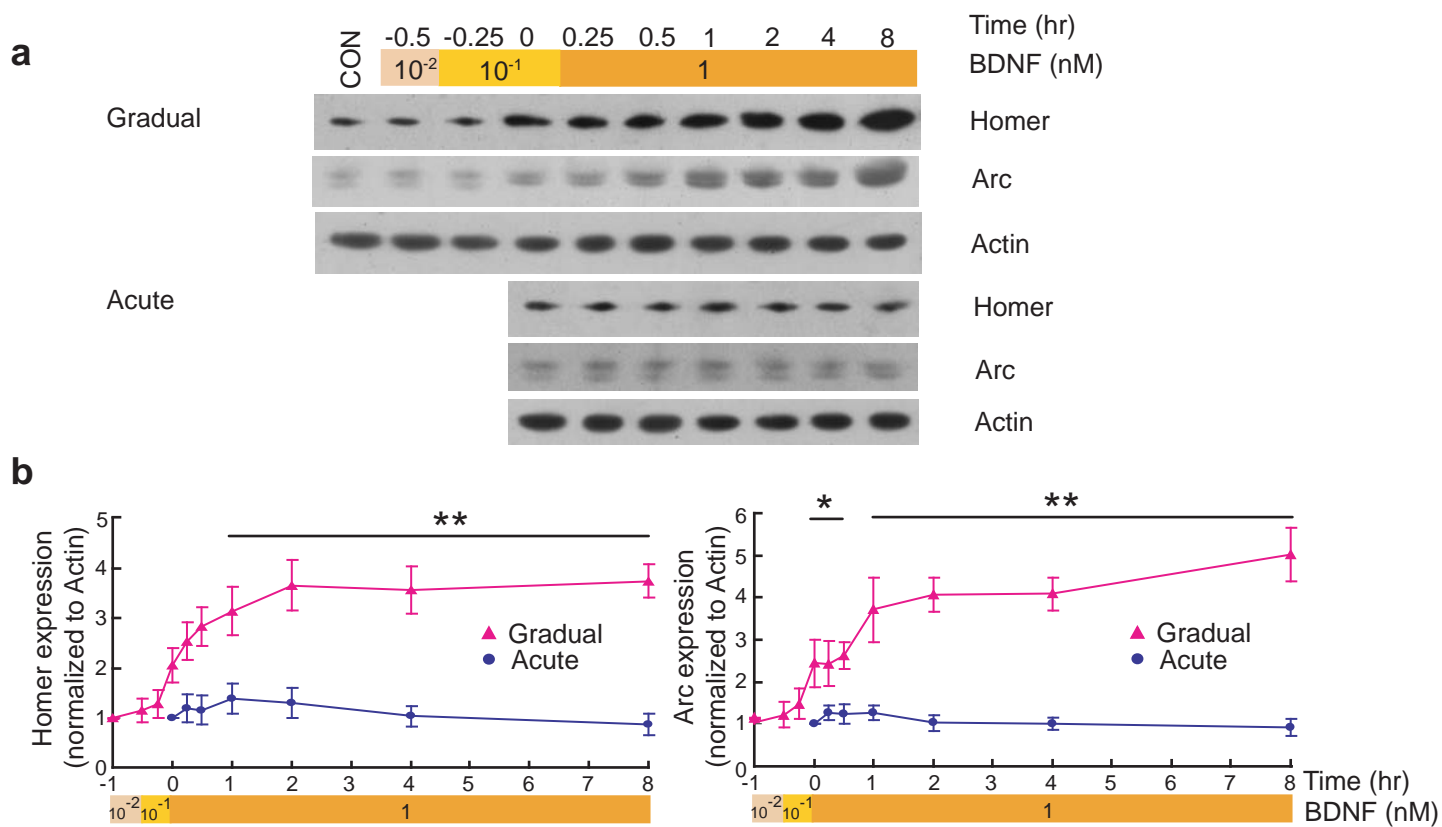

Ji et al., Figure 2

**a**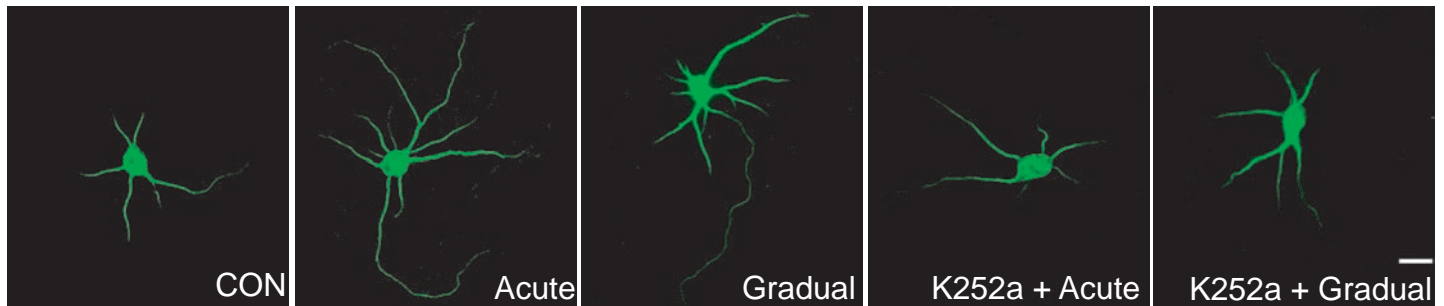**b**

Neurite parameters of cultured hippocampal neurons in each treatment

| Treatment       | <i>n</i> | Total length of neurites per cell ( $\mu\text{m}$ ) | Number of primary neurites | Number of branch points per cell |
|-----------------|----------|-----------------------------------------------------|----------------------------|----------------------------------|
| Control         | 80       | $221.1 \pm 12.5$                                    | $4.1 \pm 0.1$              | $1.65 \pm 0.14$                  |
| Acute BDNF      | 80       | $418.1 \pm 19.2$ *                                  | $9.7 \pm 0.2$ **           | $2.38 \pm 0.17$                  |
| Gradual BDNF    | 80       | $368.7 \pm 17.0$                                    | $6.3 \pm 0.2$              | $4.13 \pm 0.22$ **               |
| K252a + Acute   | 80       | $255.5 \pm 20.0$                                    | $4.0 \pm 0.3$              | $1.68 \pm 0.33$                  |
| K252a + Gradual | 80       | $257.8 \pm 18.9$                                    | $4.2 \pm 0.2$              | $2.31 \pm 0.42$                  |

\*: considered significant between acute and gradual,  $p < 0.05$ ;

\*\* : significantly different between acute and gradual,  $p < 0.01$ , ANOVA.

Ji et al., Figure 3

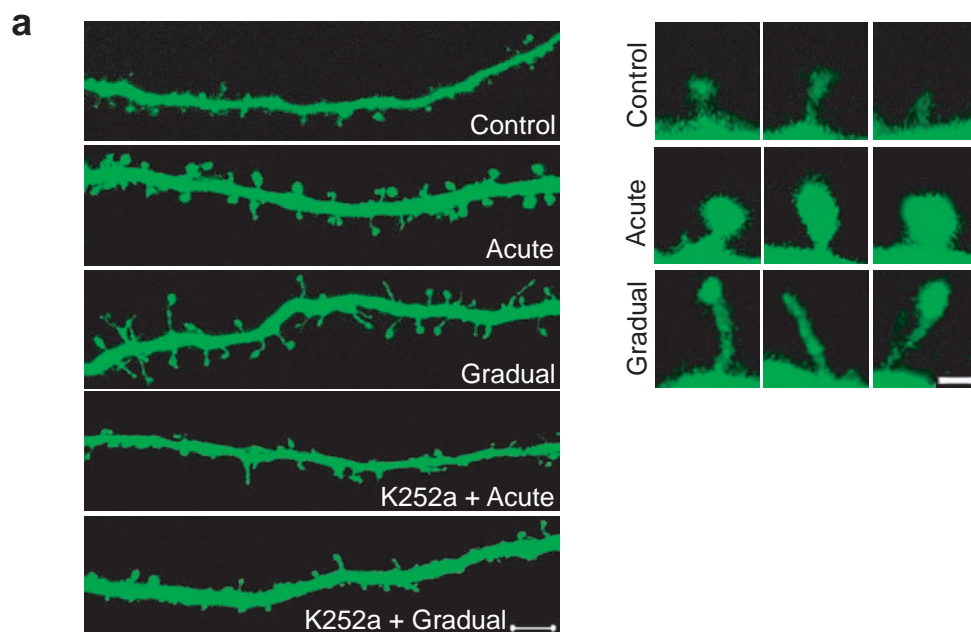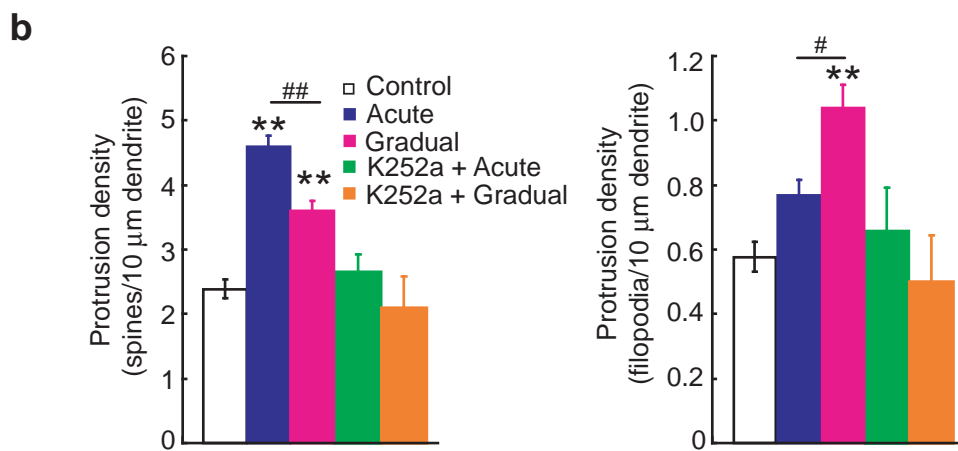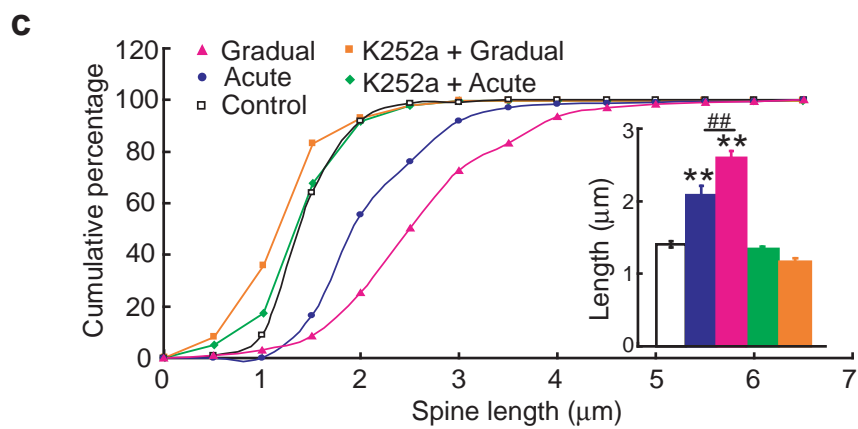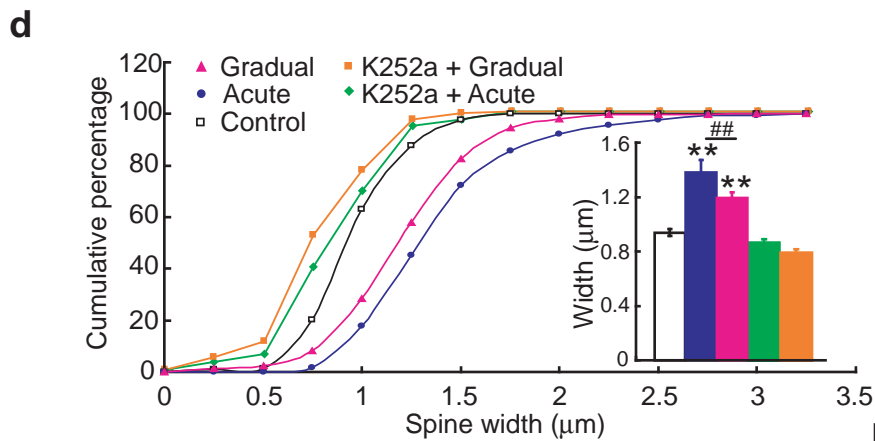

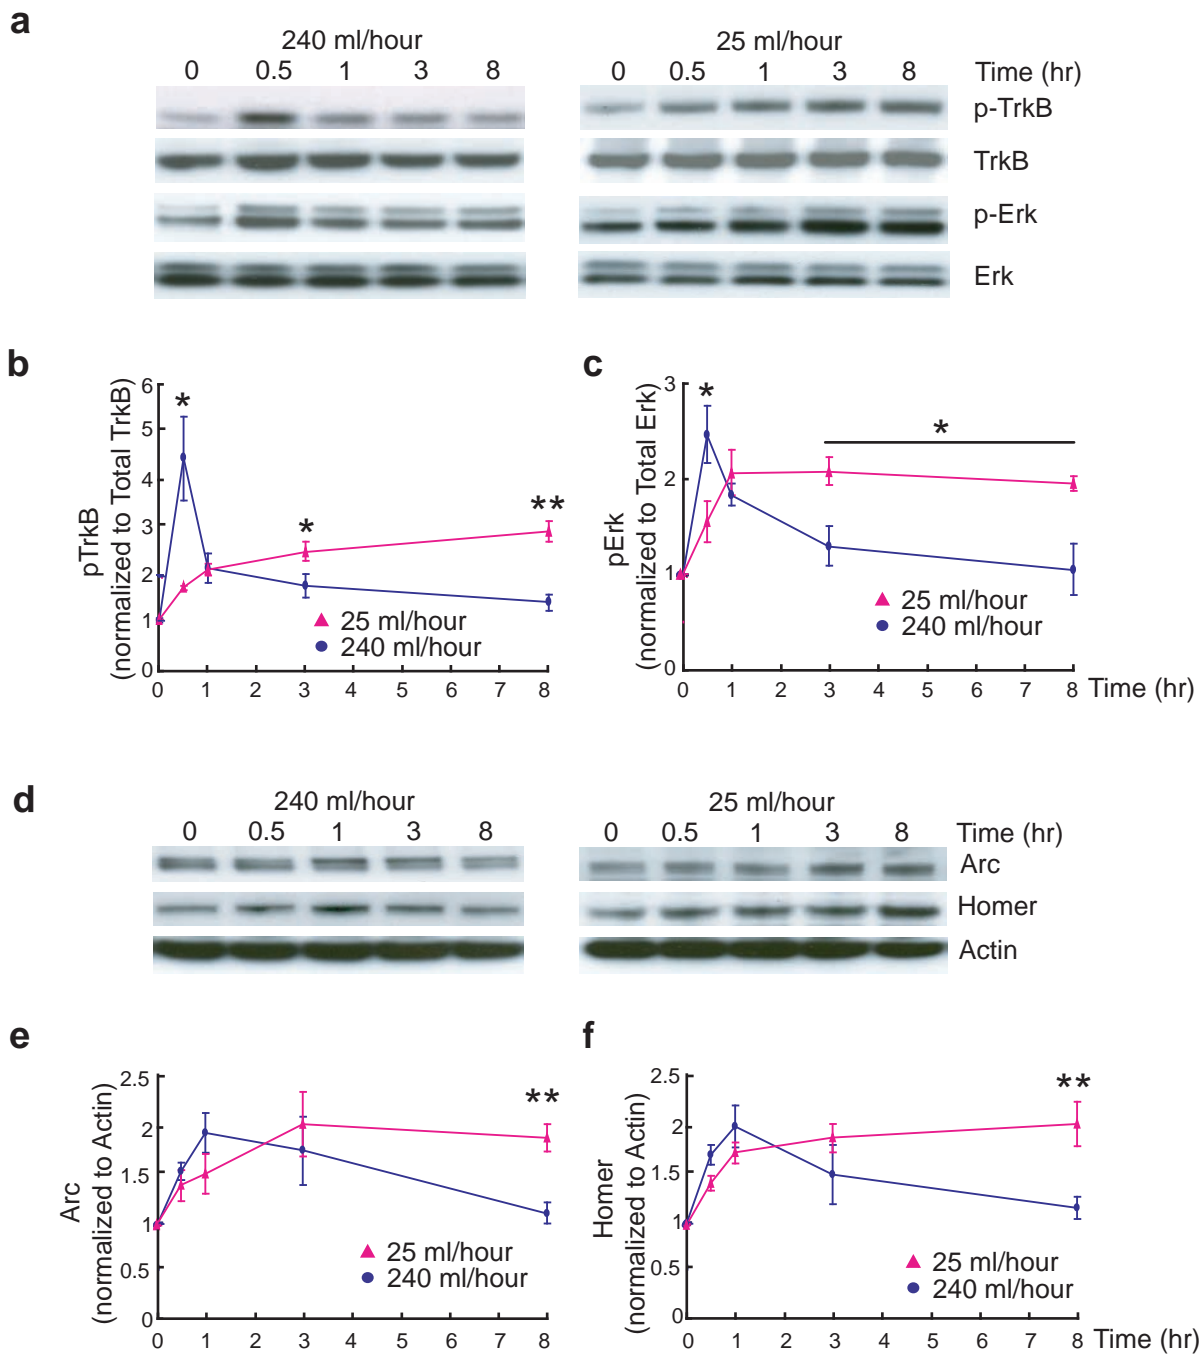

Ji et al., Figure 5

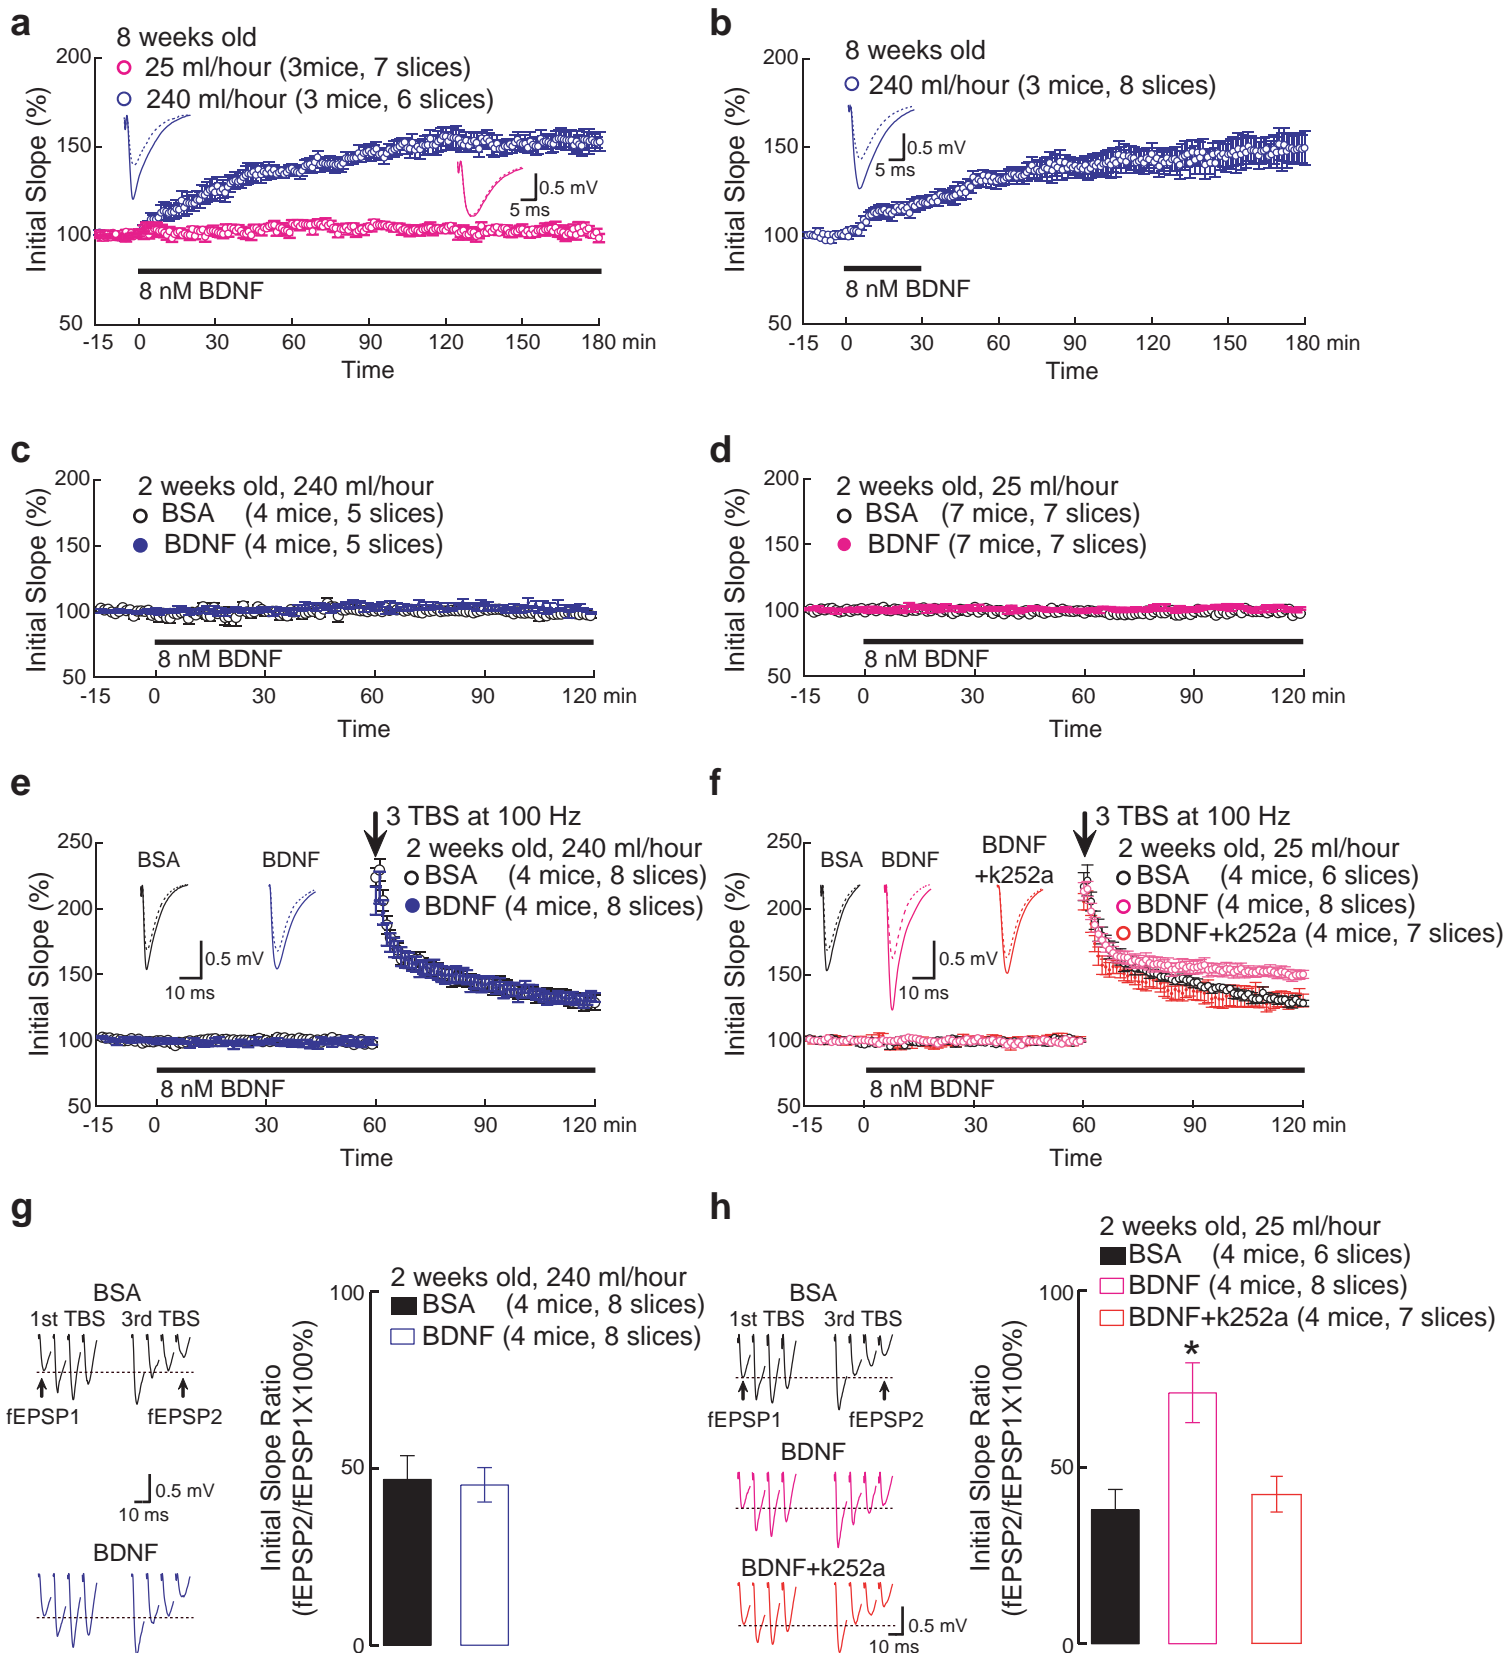

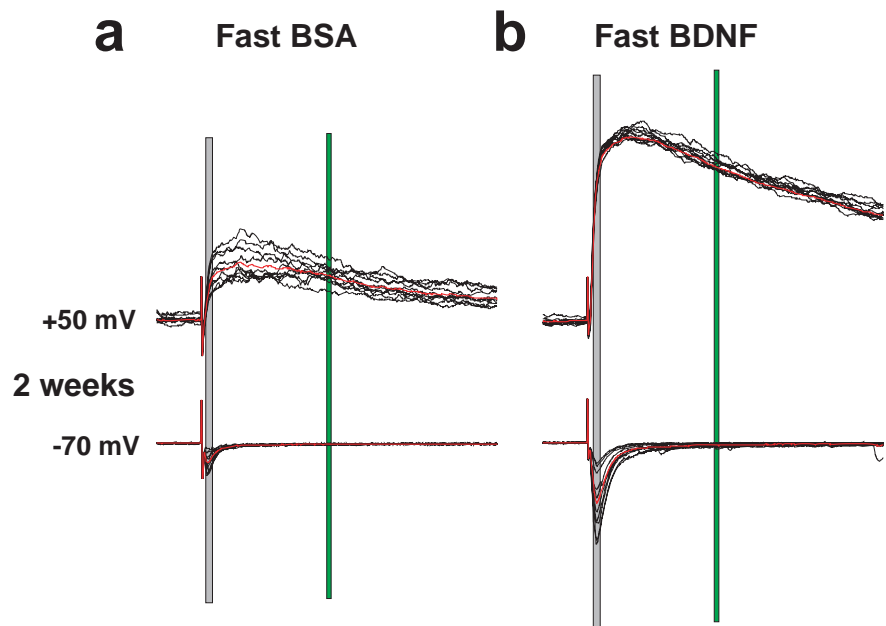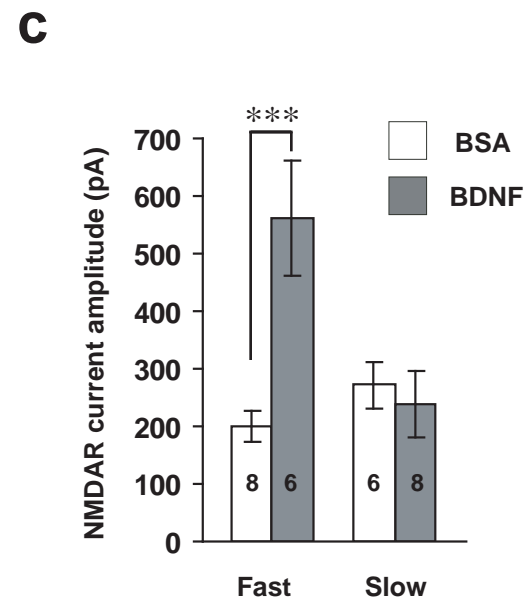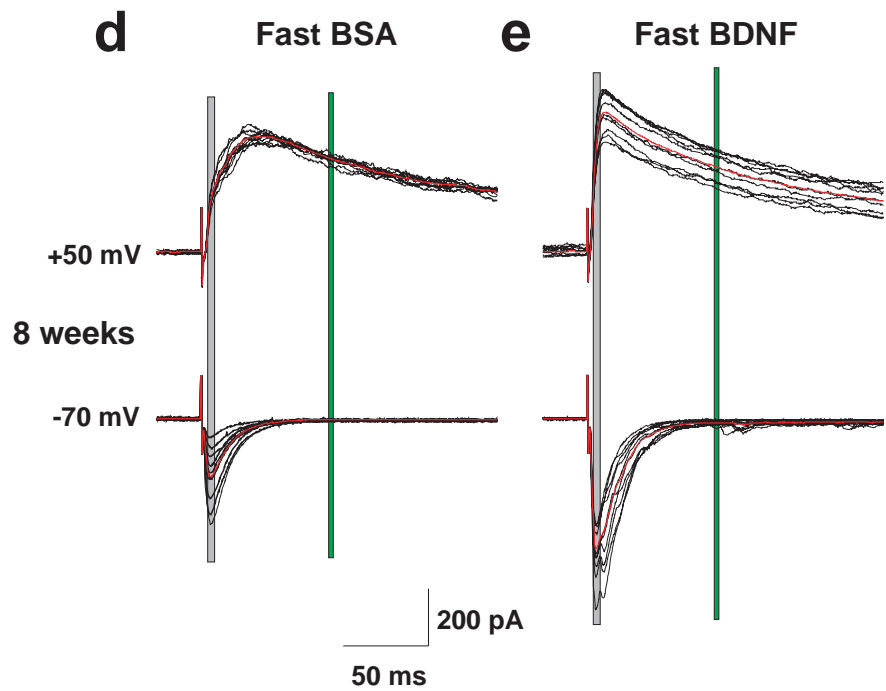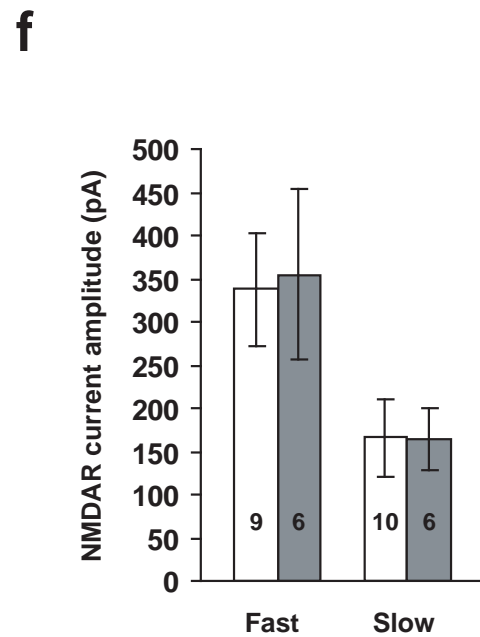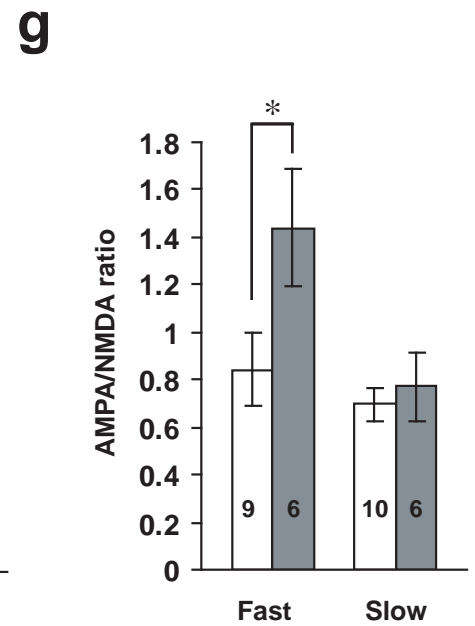

**a**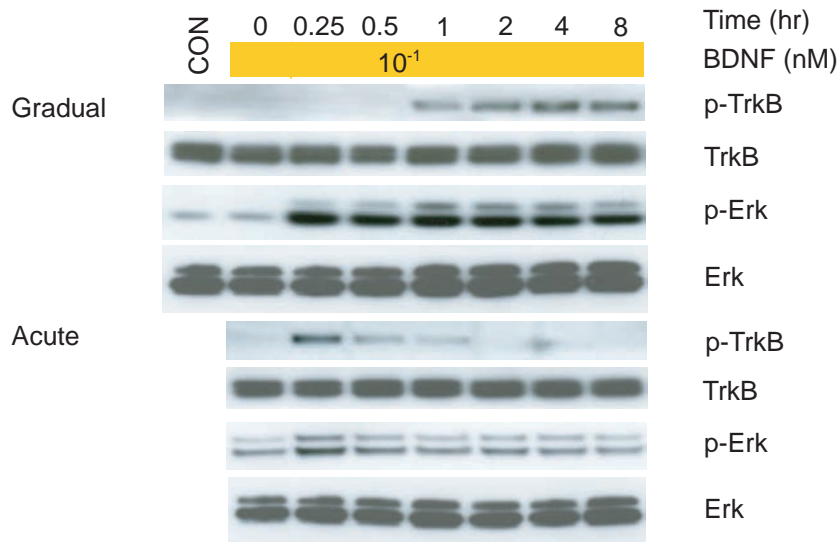**b**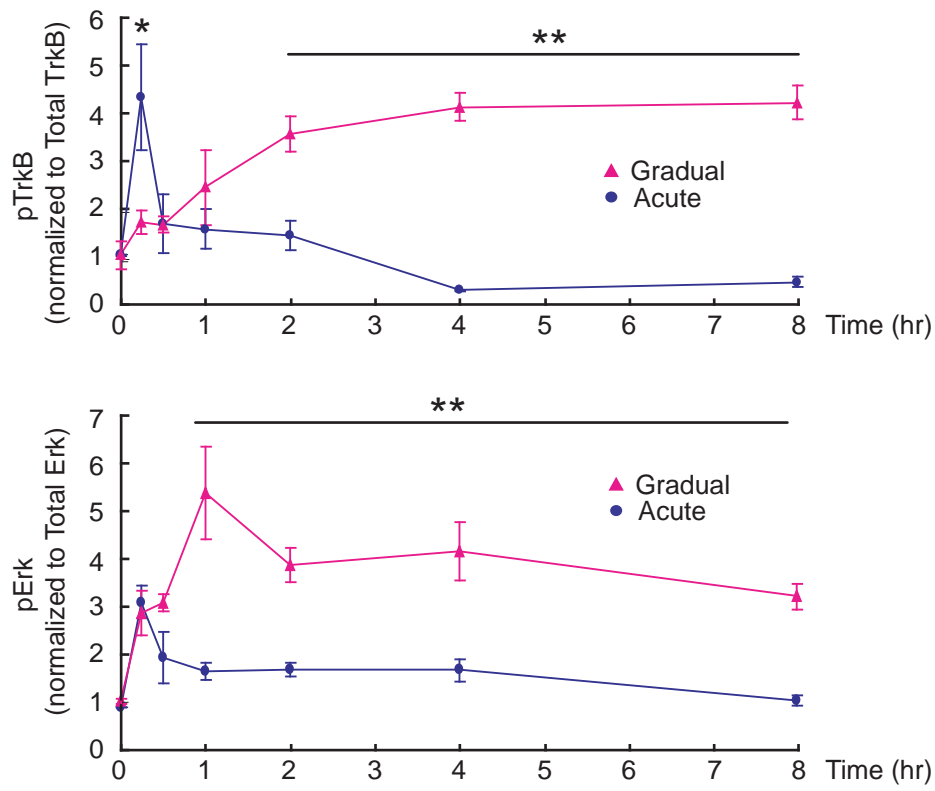

Ji et al., Supplementary Figure 1



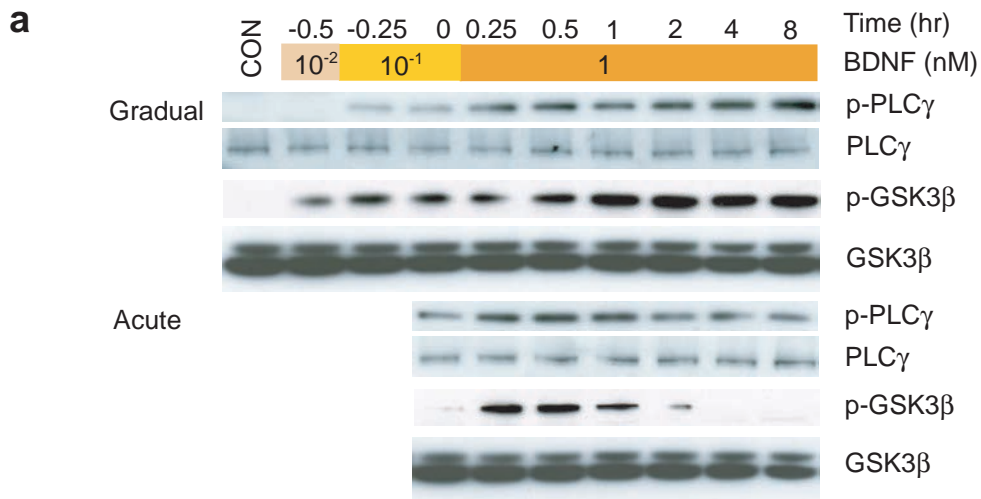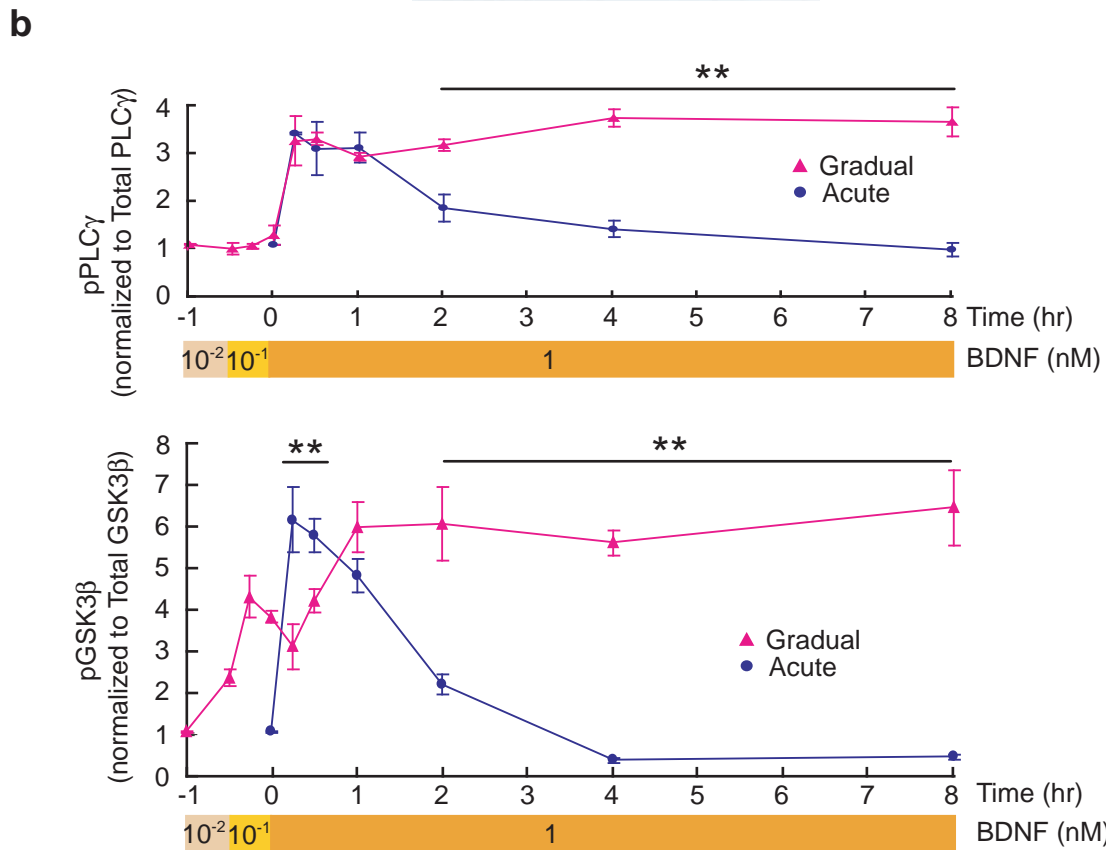

Ji et al., Supplementary Figure 2

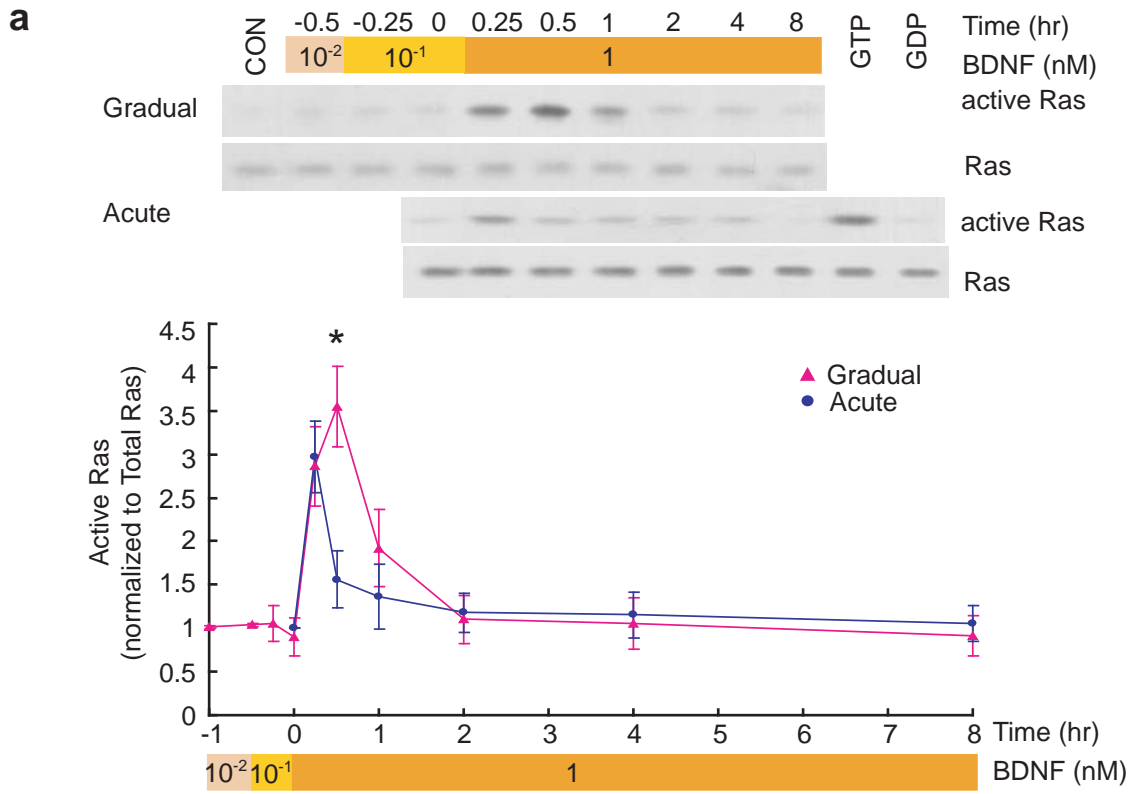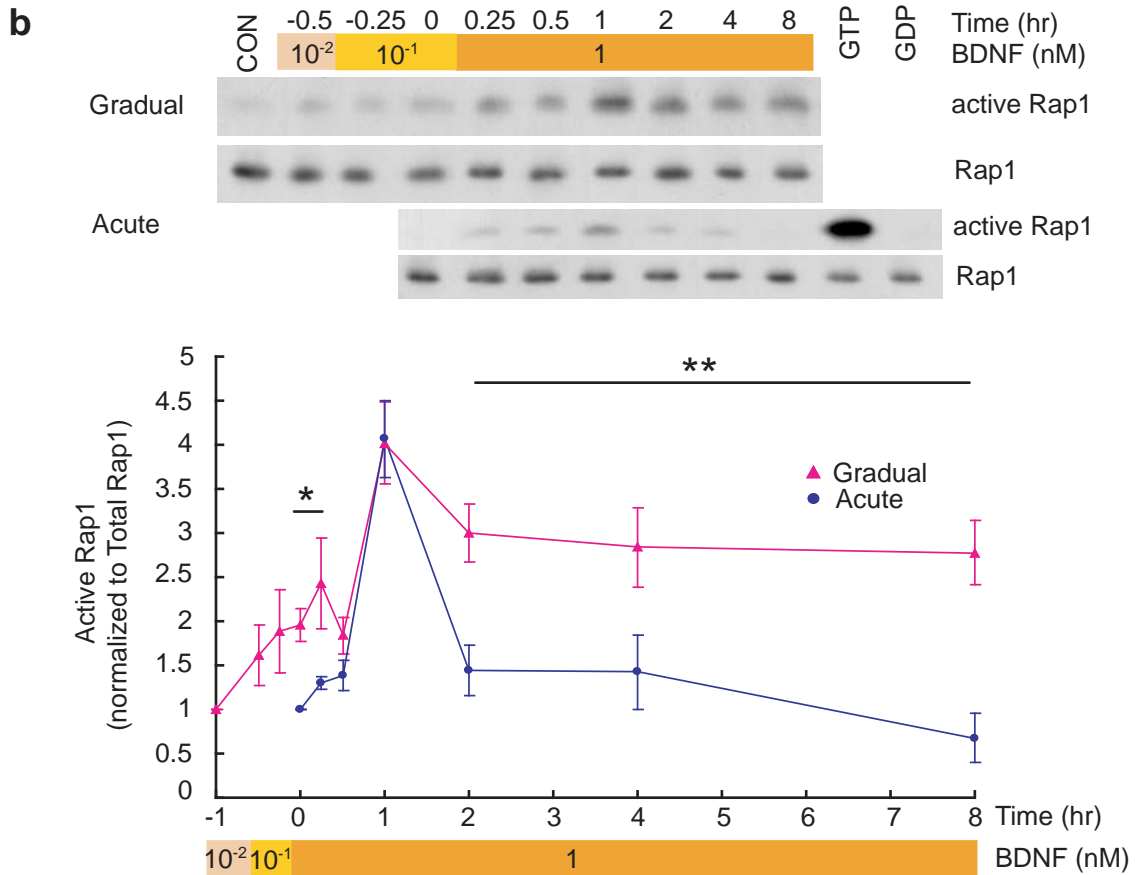

**a**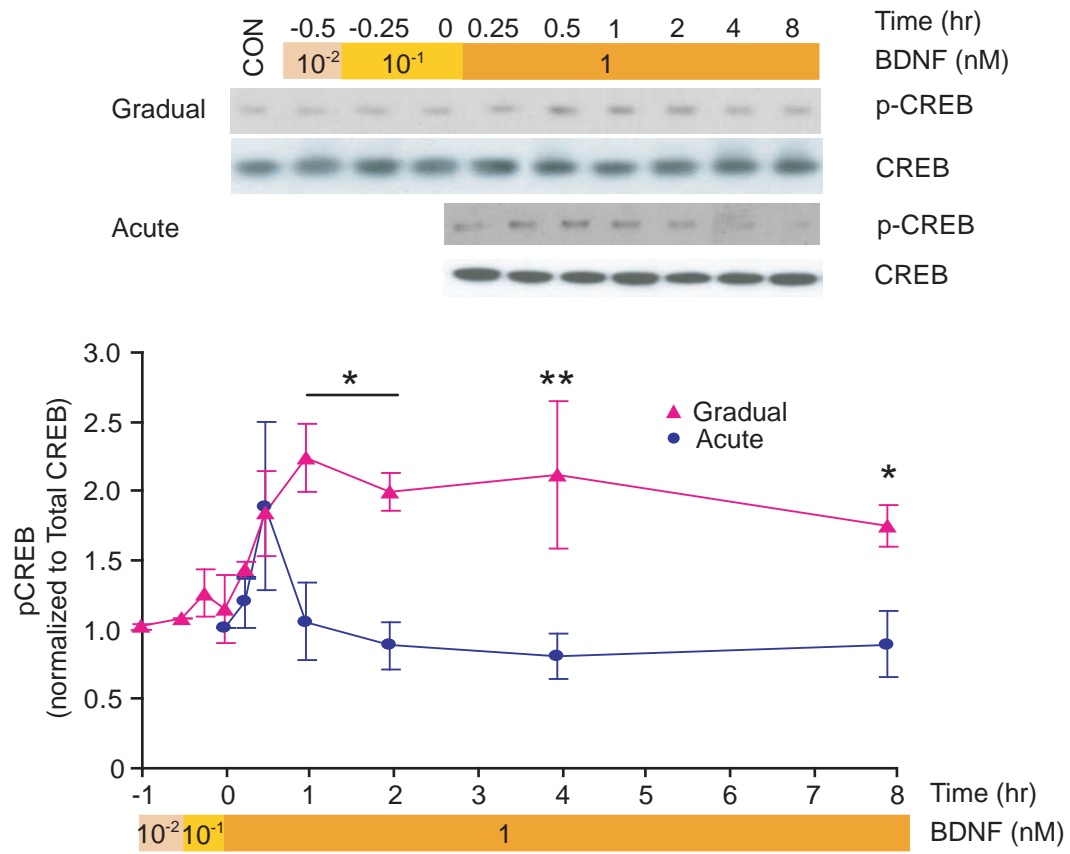**b**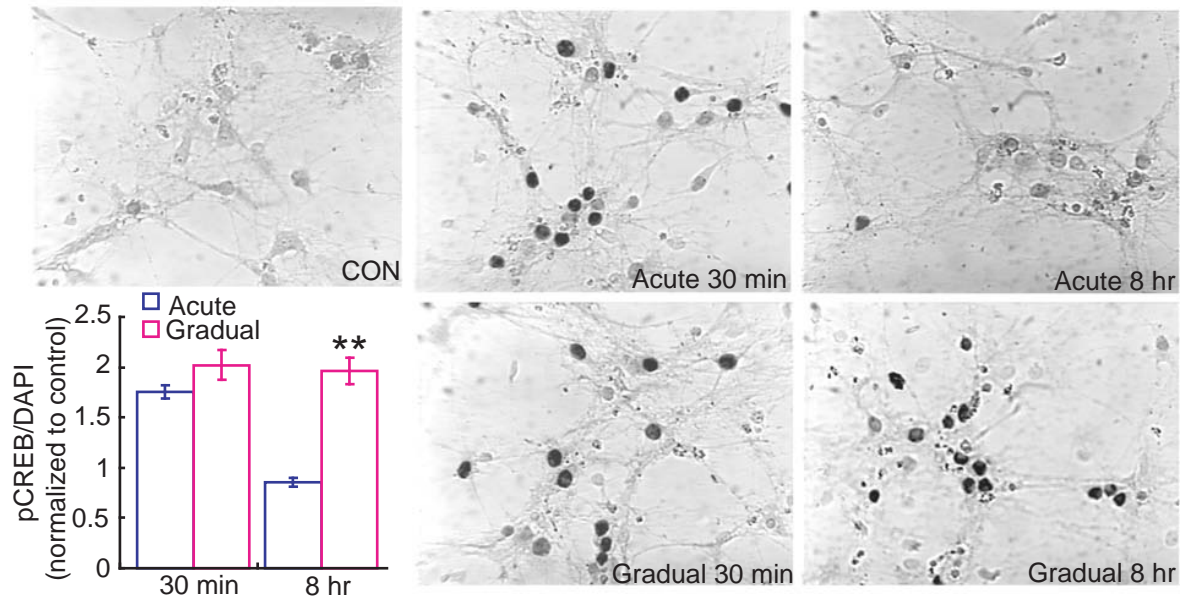

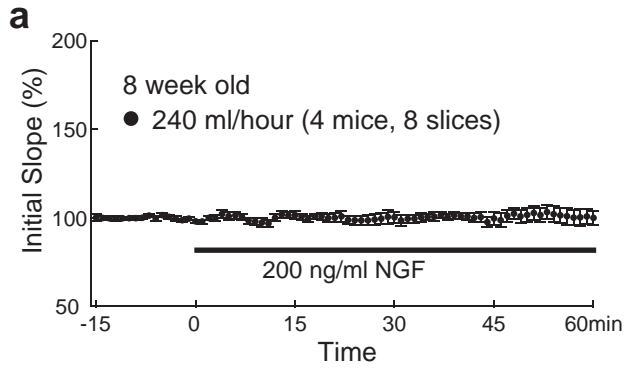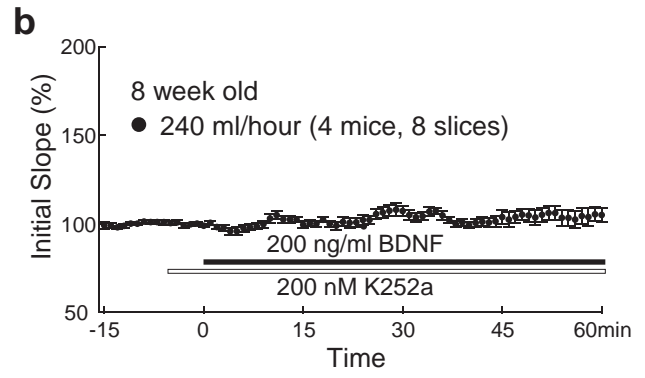

Ji et al., Supplementary Figure 5

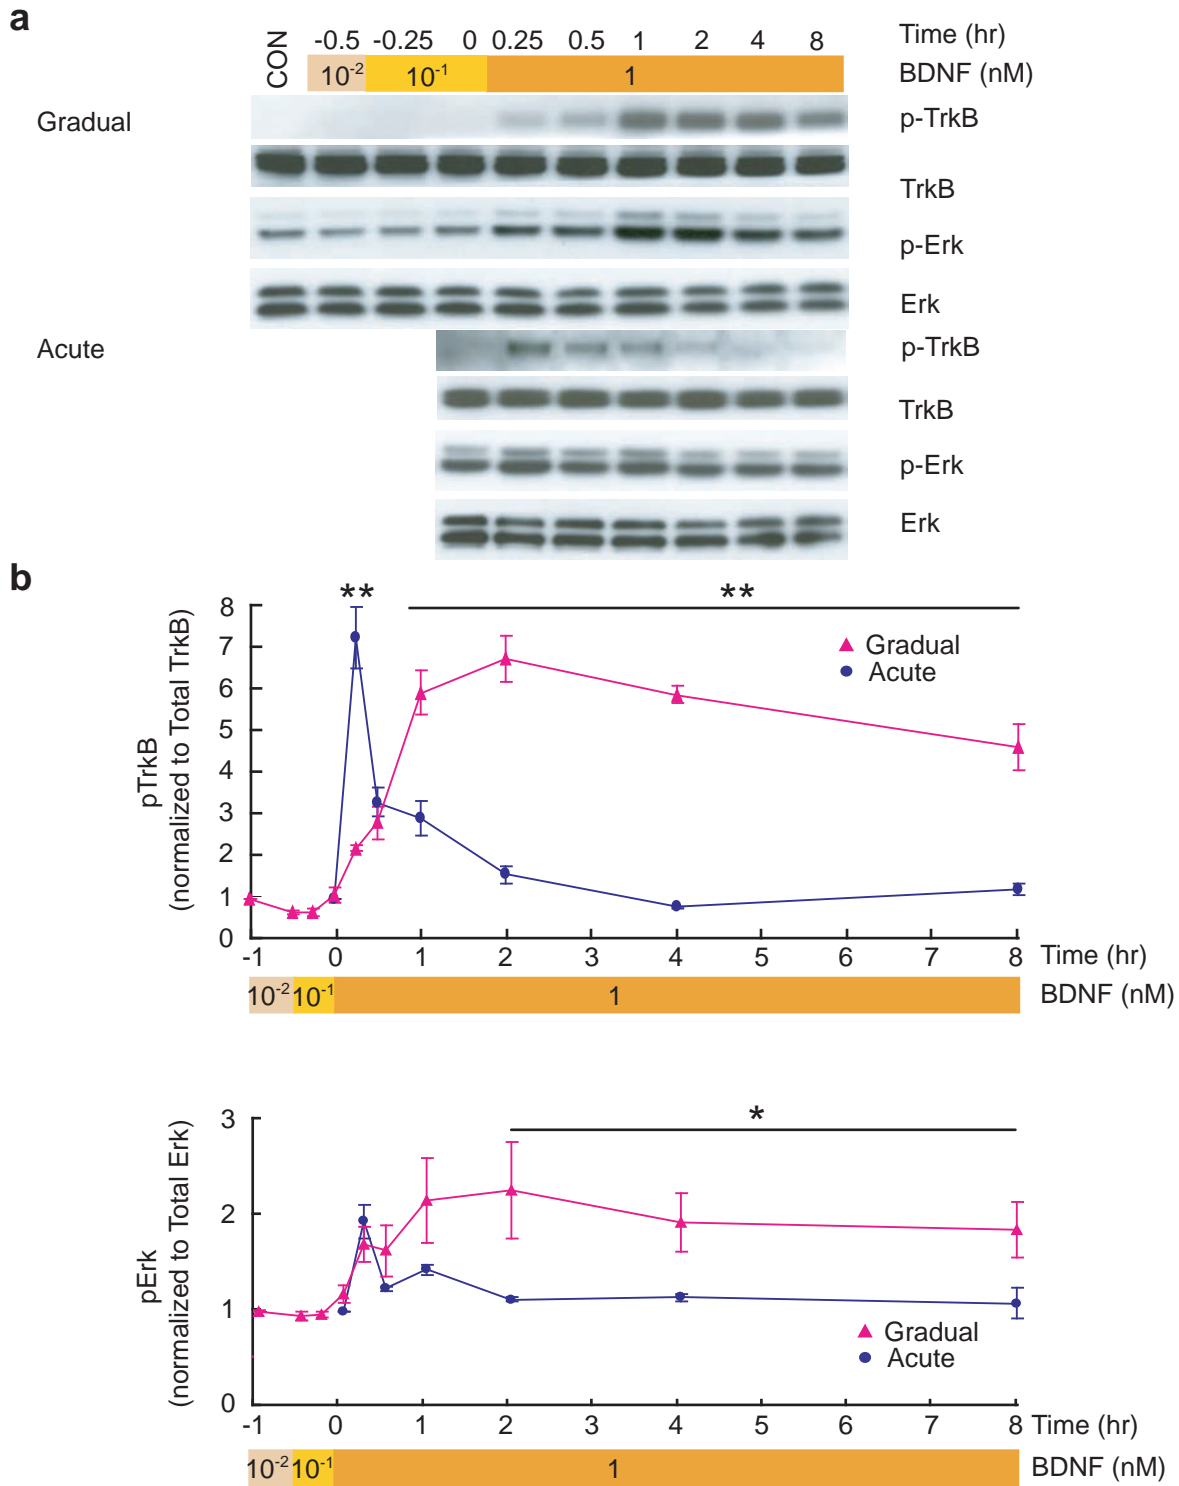

Ji et al., Supplementary Figure 6

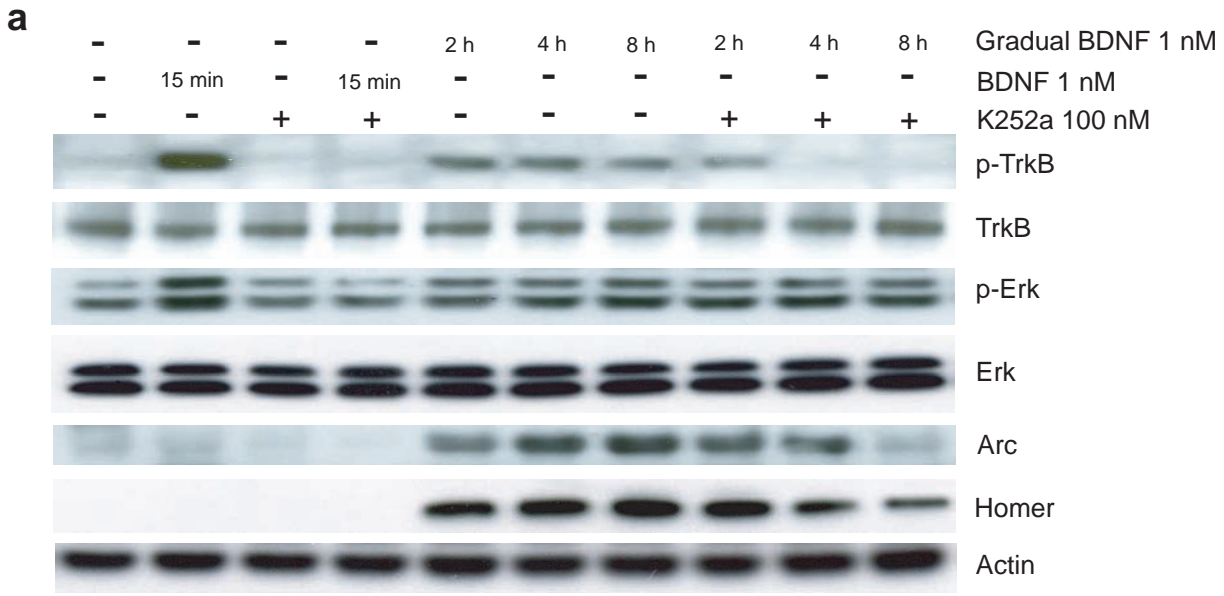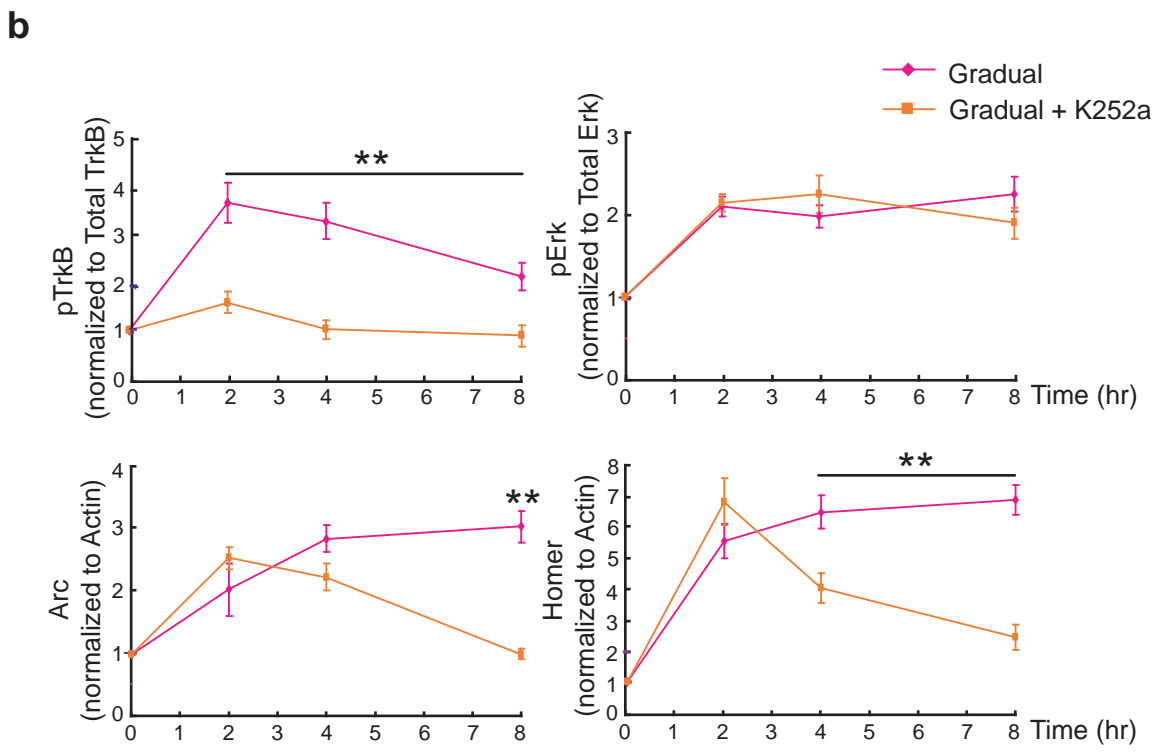

Ji et al., Supplementary Figure 7

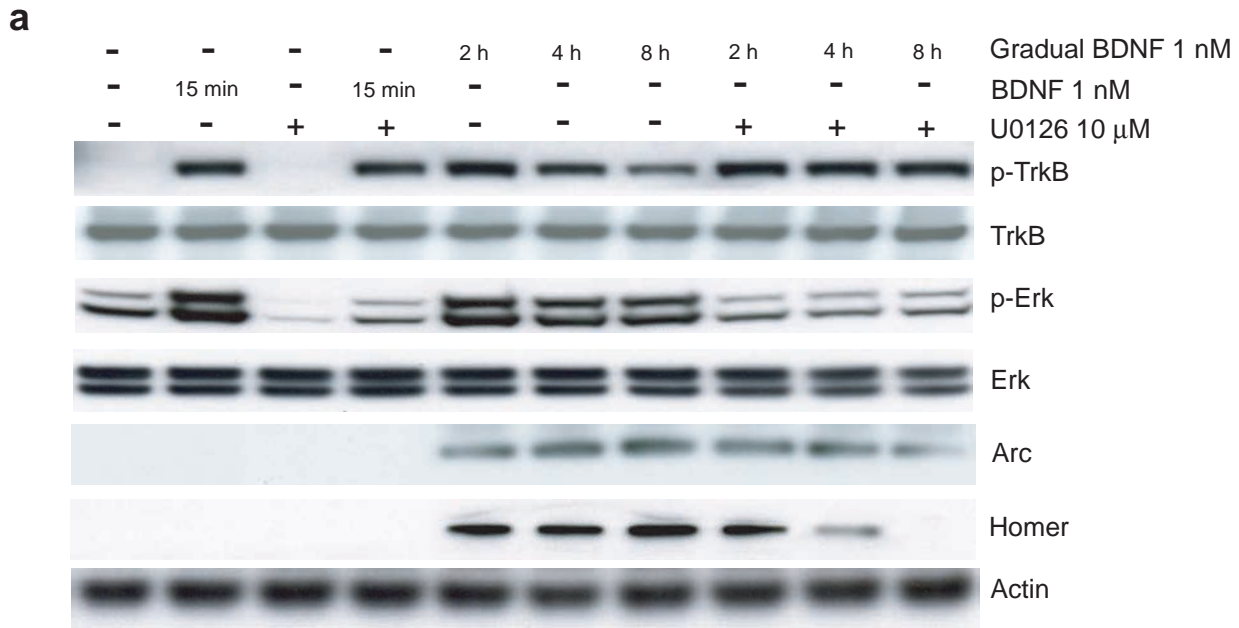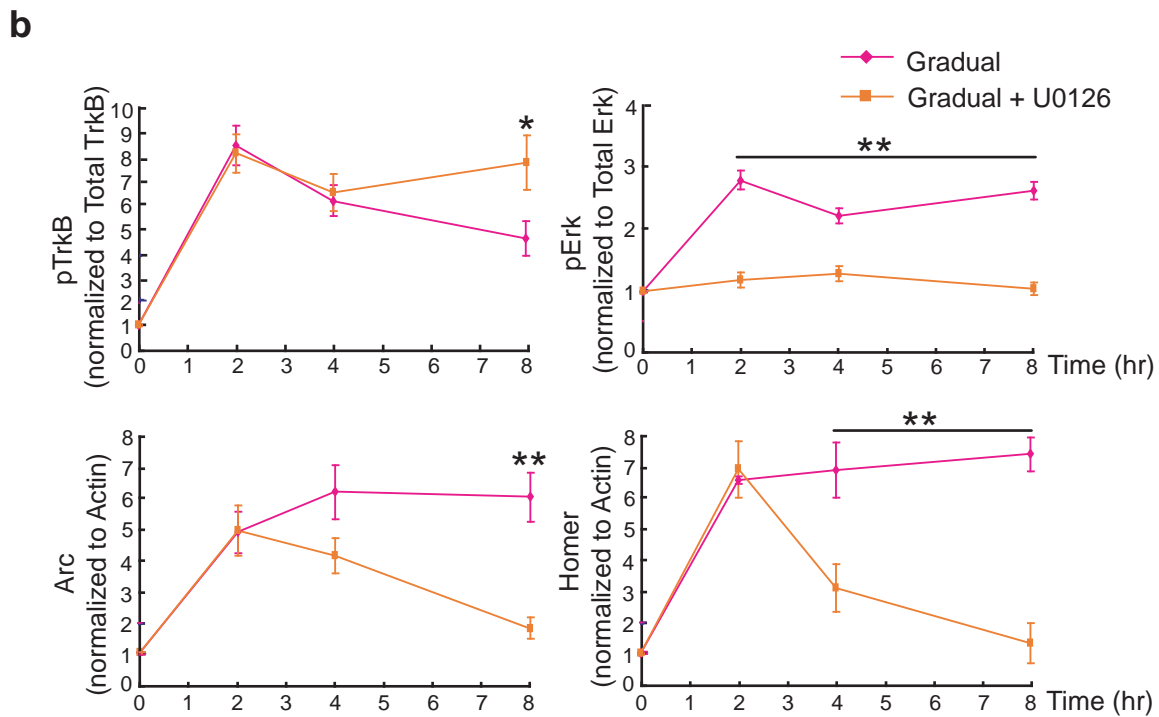

Ji et al., Supplementary Figure 8
